# Supplementary material for: Recent independent emergence of multiple multidrug-resistantSerratia marcescensclones within the United Kingdom and Ireland
Source: HighWire-hosted journal article supplement (doi:10.1101/gr.205245.116), 2016-07-18
Supplement: Supplemental_Figs.pdf [file Supplemental_Figs.pdf]

## Supplementary Figures

### Recent independent emergence of multiple multi-drug resistant *Serratia marcescens* clones within the United Kingdom and Ireland

Danesh Moradigaravand, Christine J. Boinett, Veronique Martin, Sharon J. Peacock, Julian Parkhill

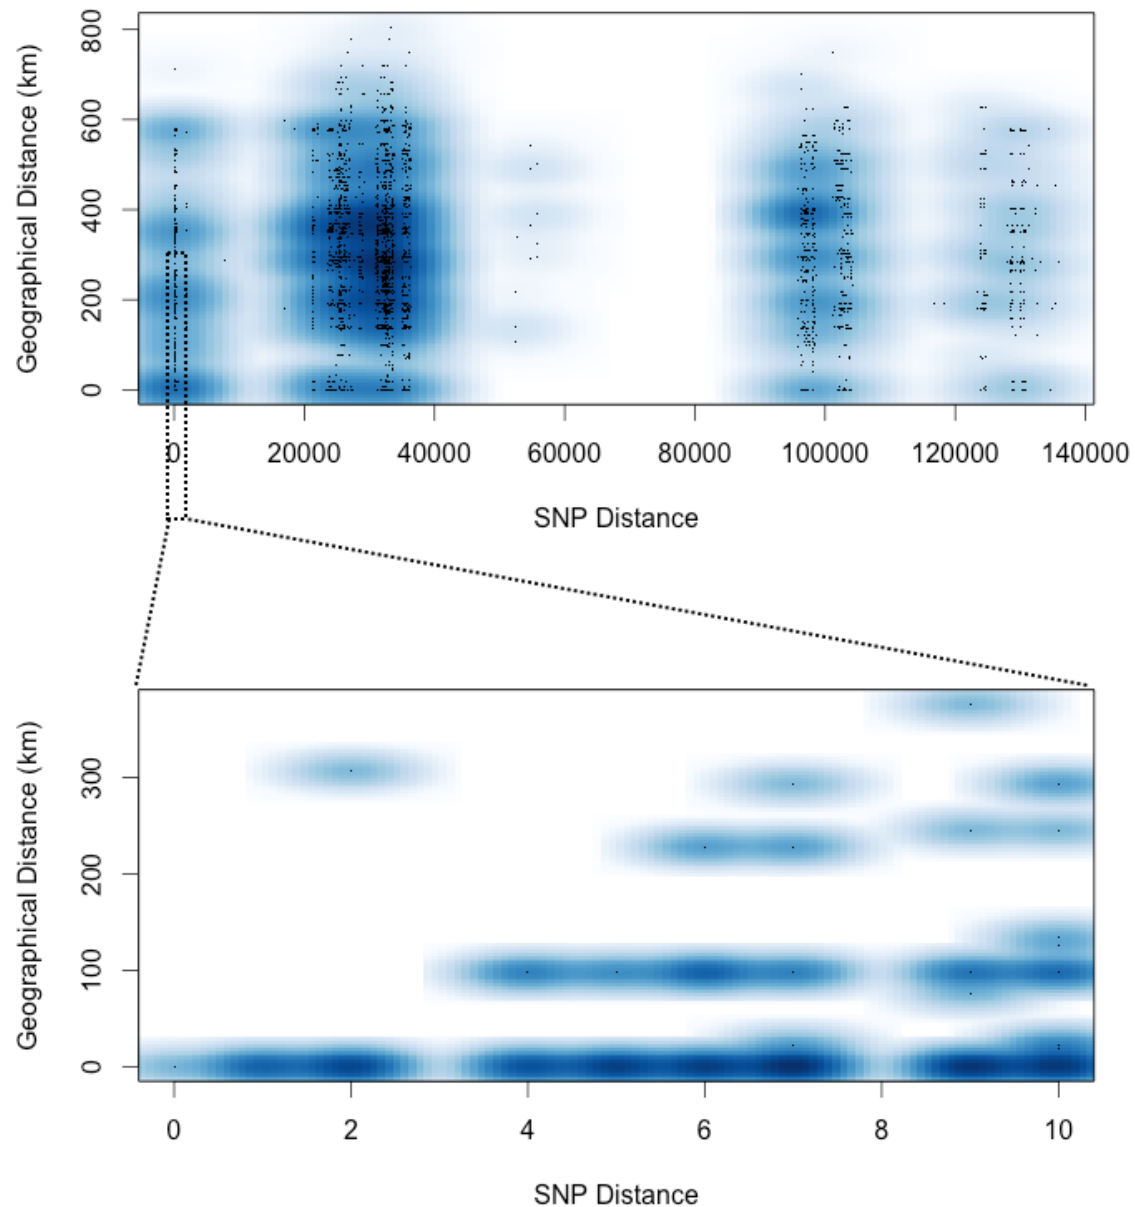

**Figure S1.** Plot of pairwise SNP distance versus the pairwise geographical distance for each isolate in the collection. The colour strength corresponds to data point densities.

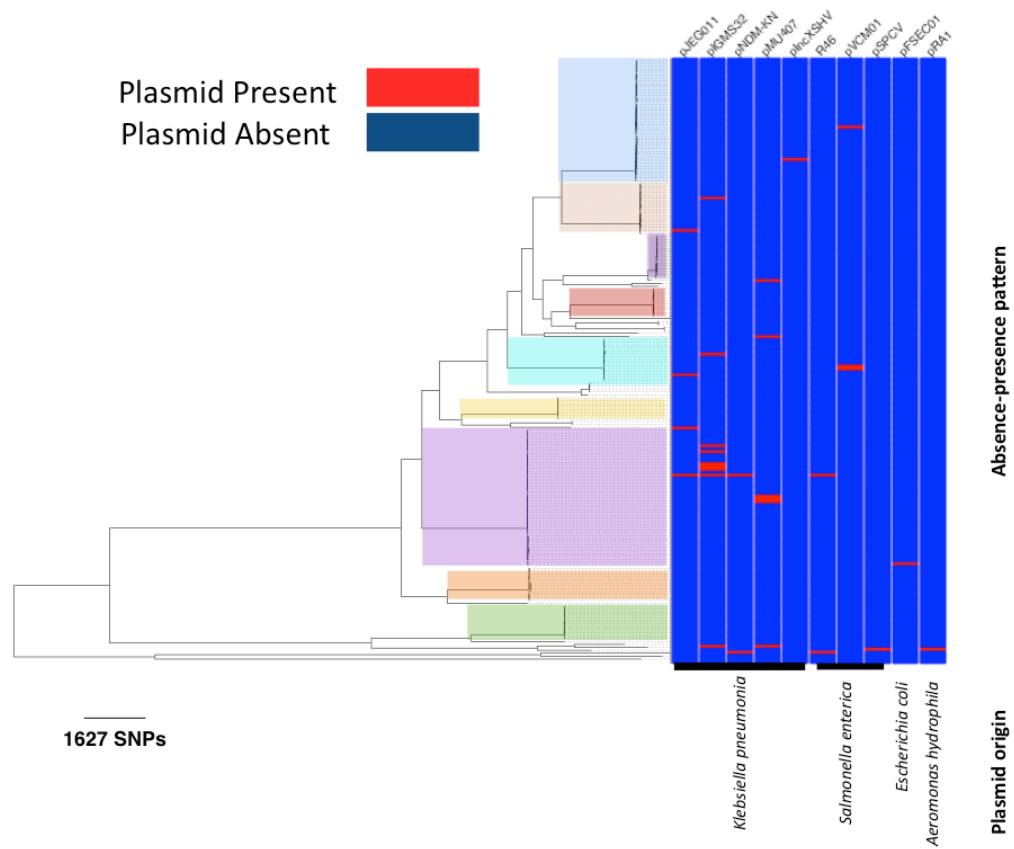

**Figure S2.** Distribution of different plasmids identified by PlasmidFinder across the maximum likelihood phylogenetic tree. The colours on the phylogenetic tree correspond to the major clades in Figure 3A.

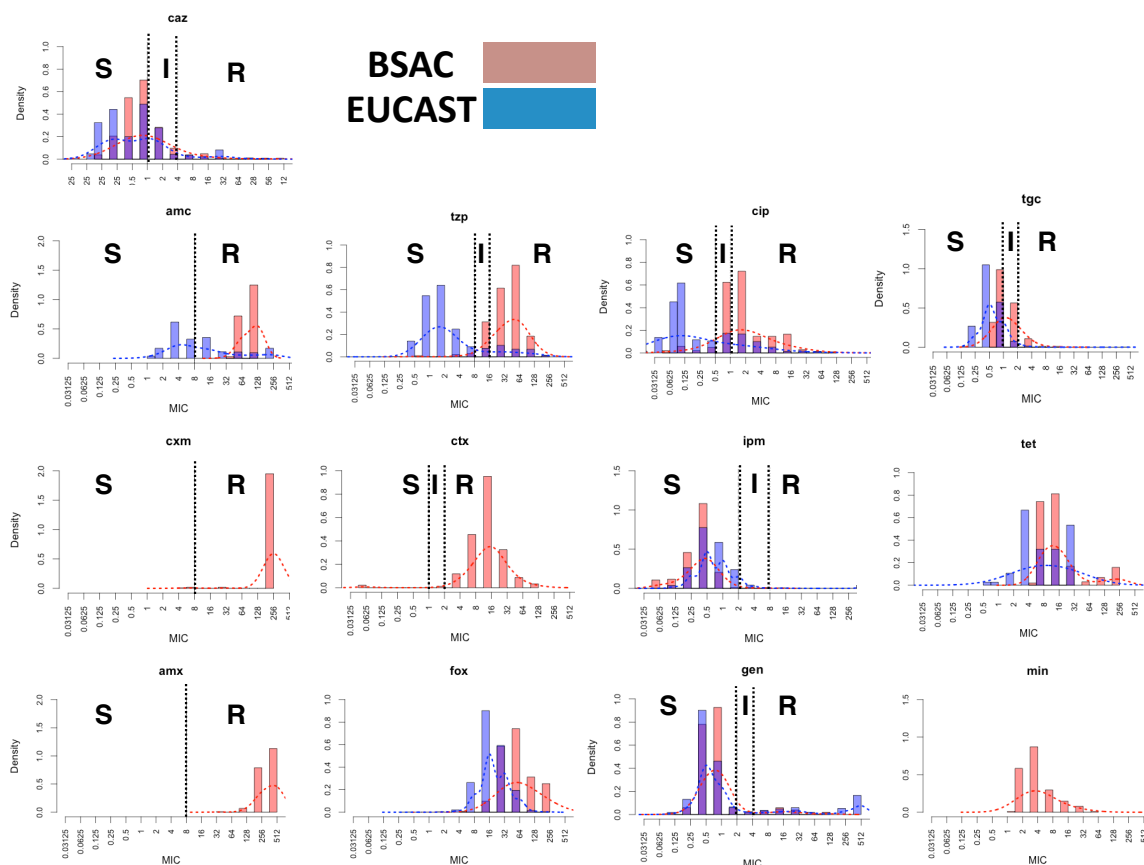

**Figure S3.** The distributions of MIC values for 13 antimicrobials for the BSAC collection (shown in red). If available, the distributions from the European Committee on Antimicrobial Susceptibility Testing website (EUCAST) are also depicted (in blue). The vertical dashed lines show the clinical cut-offs for resistance and intermediate sensitivity, respectively. The letters S, R and I stand for susceptible, resistant and intermediate, respectively. The dashed blue and red curves are density curves that show the continuous MIC distributions for the EUCAST and BSAC collections, respectively.

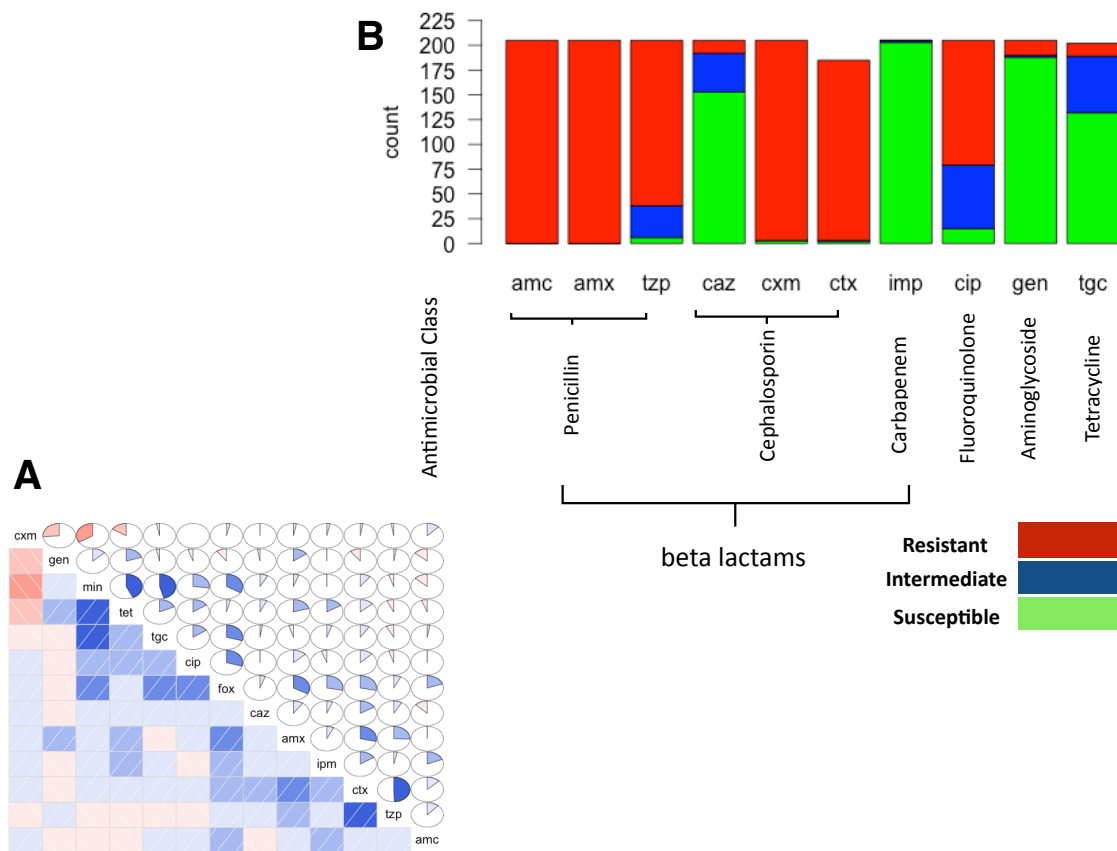

**Figure S4.** A) Correlogram of MIC values. Blue and red colours show positive and negative correlations between MIC values for pairs of antimicrobials. B) Charts of antimicrobial resistance determined by phenotypic testing for the antibiotics for which clinical breakpoints are defined. The abbreviations of antimicrobials are: amoxicillin (amx), cefuroxime (cxm), amoxicillin-clavulanate (amc), cefotaxime (ctx), ceftazidime (caz), imipenem (imp), piperacillin-tazobactam (tvp), ciprofloxacin (cip), gentamicin (gen), tigecycline (tgc), minocycline (min) and tetracycline (tet).

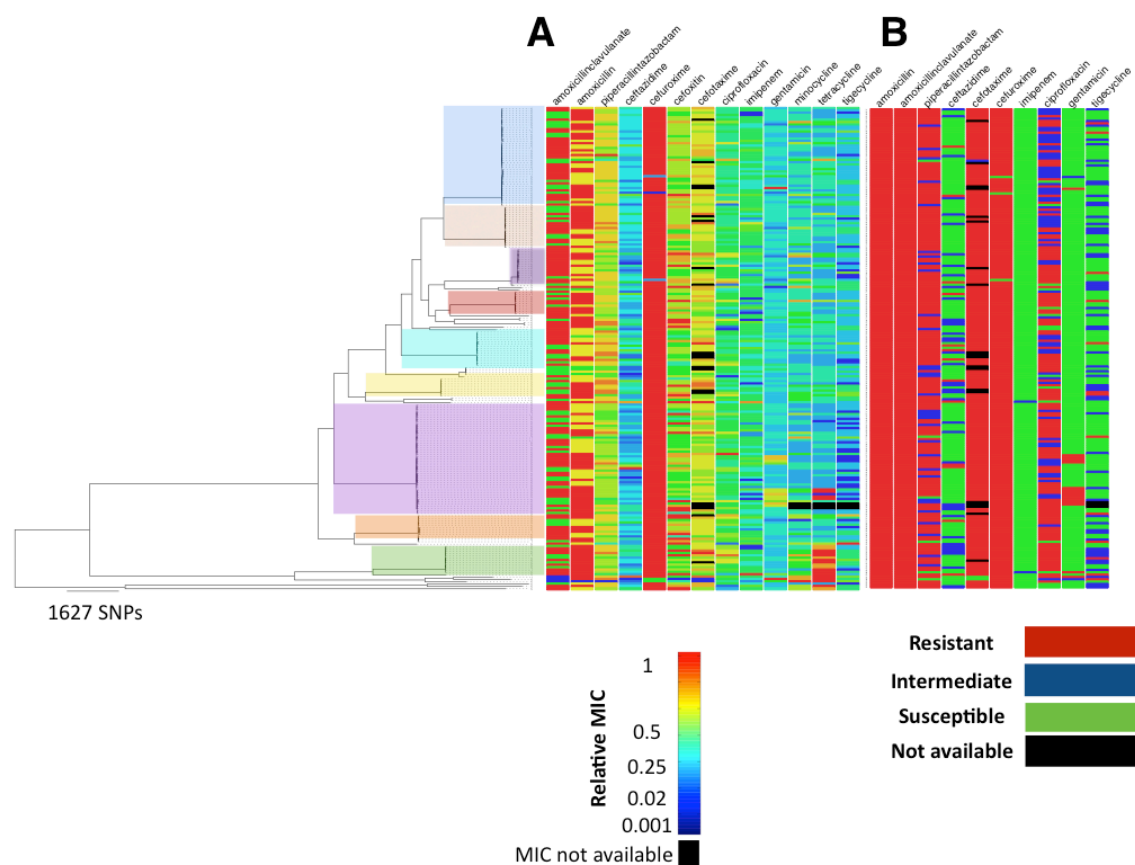

**Figure S5.** A) Distribution of MIC values across the phylogenetic tree for various antimicrobials. B) Distribution of antimicrobial resistance across the phylogenetic tree determined by phenotypic testing for the antimicrobials for which clinical breakpoints are defined. The colours on the phylogenetic tree correspond to major clades in Figure 3A.
